# Supplementary material
Source: PubMed Central journal article supplement (PMC9768836)
Supplement: NIHMS1850949-supplement-Supplemental_Material.pdf [file NIHMS1850949-supplement-Supplemental_Material.pdf]

**Supplementary Table S1. Additional baseline characteristics**

| <b>Characteristics</b>   | <b>(N=28)</b> |
|--------------------------|---------------|
| <b>Smoking status</b>    |               |
| Never smoker             | 13 (46%)      |
| Former smoker            | 14 (50%)      |
| Current smoker           | 1 (4%)        |
| <b>Race/Ethnicity</b>    |               |
| White                    | 23 (81%)      |
| African American         | 2 (7%)        |
| Asian                    | 1 (4%)        |
| Declined to answer       | 1 (4%)        |
| Other                    | 1 (4%)        |
| <b>ECOG PS - no. (%)</b> |               |
| 0                        | 14 (50%)      |
| 1                        | 14 (50%)      |

ECOG PS: Eastern Cooperative Oncology Group performance status

**Supplemental Table S2: All Treatment Related Adverse Events**

| <b>All Treatment Related Adverse Event</b>                  | Total (N=28)    |                   |
|-------------------------------------------------------------|-----------------|-------------------|
|                                                             | All<br>N (%)    | Grade 3+<br>N (%) |
| <b>Any Events</b>                                           | <b>26 (93%)</b> | <b>6 (21%)</b>    |
| Lipase increased                                            | 5 (18%)         | 4 (14%)           |
| Alanine aminotransferase increased                          | 6 (21%)         | 2 (7%)            |
| Aspartate aminotransferase increased                        | 6 (21%)         | 2 (7%)            |
| Blood bilirubin increased                                   | 3 (11%)         | 1 (4%)            |
| Serum amylase increased                                     | 8 (29%)         | 1 (4%)            |
| Hyponatremia                                                | 4 (14%)         | 1 (4%)            |
| Diarrhea                                                    | 3 (11%)         | 1 (4%)            |
| Autoimmune disorder                                         | 1 (4%)          | 1 (4%)            |
| Colitis                                                     | 1 (4%)          | 1 (4%)            |
| Hepatic failure                                             | 1 (4%)          | 1 (4%)            |
| Rash maculo-papular                                         | 8 (29%)         | 0 (0%)            |
| Pruritus                                                    | 7 (25%)         | 0 (0%)            |
| Fatigue                                                     | 5 (18%)         | 0 (0%)            |
| Hyperthyroidism                                             | 5 (18%)         | 0 (0%)            |
| Anemia                                                      | 4 (14%)         | 0 (0%)            |
| Hyperkalemia                                                | 4 (14%)         | 0 (0%)            |
| Hypomagnesemia                                              | 4 (14%)         | 0 (0%)            |
| INR increased                                               | 4 (14%)         | 0 (0%)            |
| Nausea                                                      | 4 (14%)         | 0 (0%)            |
| Alkaline phosphatase increased                              | 3 (11%)         | 0 (0%)            |
| Constipation                                                | 3 (11%)         | 0 (0%)            |
| Hypoalbuminemia                                             | 3 (11%)         | 0 (0%)            |
| Hypocalcemia                                                | 3 (11%)         | 0 (0%)            |
| Arthralgia                                                  | 2 (7%)          | 0 (0%)            |
| Creatinine increased                                        | 2 (7%)          | 0 (0%)            |
| Lymphocyte count decreased                                  | 2 (7%)          | 0 (0%)            |
| Vomiting                                                    | 2 (7%)          | 0 (0%)            |
| Anxiety                                                     | 1 (4%)          | 0 (0%)            |
| Back pain                                                   | 1 (4%)          | 0 (0%)            |
| Cough                                                       | 1 (4%)          | 0 (0%)            |
| Dry mouth                                                   | 1 (4%)          | 0 (0%)            |
| Dry skin                                                    | 1 (4%)          | 0 (0%)            |
| Edema limbs                                                 | 1 (4%)          | 0 (0%)            |
| Endocrine disorders - Other, specify-TSH Decrease           | 1 (4%)          | 0 (0%)            |
| Endocrine disorders - Other, specify-TSH Elevated decreased | 1 (4%)          | 0 (0%)            |
| Enterocolitis                                               | 1 (4%)          | 0 (0%)            |
| Flatulence                                                  | 1 (4%)          | 0 (0%)            |
| Flu like symptoms                                           | 1 (4%)          | 0 (0%)            |
| Gastroesophageal reflux disease                             | 1 (4%)          | 0 (0%)            |
| Headache                                                    | 1 (4%)          | 0 (0%)            |
| Hiccups                                                     | 1 (4%)          | 0 (0%)            |
| Hyperglycemia                                               | 1 (4%)          | 0 (0%)            |
| Hypermagnesemia                                             | 1 (4%)          | 0 (0%)            |
| Hypernatremia                                               | 1 (4%)          | 0 (0%)            |
| Hypertension                                                | 1 (4%)          | 0 (0%)            |
| Hypertriglyceridemia                                        | 1 (4%)          | 0 (0%)            |
| Hyperuricemia                                               | 1 (4%)          | 0 (0%)            |
| Hypotension                                                 | 1 (4%)          | 0 (0%)            |
| Hypothyroidism                                              | 1 (4%)          | 0 (0%)            |
| Infusion related reaction                                   | 1 (4%)          | 0 (0%)            |
| Investigations - Other, specify-AST increase                | 1 (4%)          | 0 (0%)            |
| Investigations - Other, specify-BUN Increase                | 1 (4%)          | 0 (0%)            |
| Investigations - Other, specify-Elevated WBC                | 1 (4%)          | 0 (0%)            |

**Supplemental Table S2: All Treatment Related Adverse Events**

| <b>All Treatment Related Adverse Event</b>                       | Total (N=28) |                   |
|------------------------------------------------------------------|--------------|-------------------|
|                                                                  | All<br>N (%) | Grade 3+<br>N (%) |
| Investigations - Other, specify-Fibrinogen Increase              | 1 (4%)       | 0 (0%)            |
| Investigations - Other, specify-Gamma Glutamyl Transferase GGT i | 1 (4%)       | 0 (0%)            |
| Investigations - Other, specify-Increased Fibrinogen             | 1 (4%)       | 0 (0%)            |
| Investigations - Other, specify-PTT Increase                     | 1 (4%)       | 0 (0%)            |
| Investigations - Other, specify-Prothrombin Time Increased       | 1 (4%)       | 0 (0%)            |
| Investigations - Other, specify-Total Protein Increase           | 1 (4%)       | 0 (0%)            |
| Investigations - Other, specify-fibrinogen increase              | 1 (4%)       | 0 (0%)            |
| Lymphocyte count increased                                       | 1 (4%)       | 0 (0%)            |
| Metabolism and nutrition disorders - Other, specify-CO2 Decrease | 1 (4%)       | 0 (0%)            |
| Metabolism and nutrition disorders - Other, specify-Decreased WB | 1 (4%)       | 0 (0%)            |
| Myalgia                                                          | 1 (4%)       | 0 (0%)            |
| Nervous system disorders - Other, specify-Left foot pronation    | 1 (4%)       | 0 (0%)            |
| Neutrophil count decreased                                       | 1 (4%)       | 0 (0%)            |
| Pain                                                             | 1 (4%)       | 0 (0%)            |
| Platelet count decreased                                         | 1 (4%)       | 0 (0%)            |
| Rash acneiform                                                   | 1 (4%)       | 0 (0%)            |
| Sinus tachycardia                                                | 1 (4%)       | 0 (0%)            |
| Tinnitus                                                         | 1 (4%)       | 0 (0%)            |

**Supplemental Table S3: All Adverse Events Regardless of Relation**

| <b>All Adverse Event</b>                                         | Total (N=28)     |                   |
|------------------------------------------------------------------|------------------|-------------------|
|                                                                  | All<br>N (%)     | Grade 3+<br>N (%) |
| <b>Any Event</b>                                                 | <b>28 (100%)</b> | <b>15 (54%)</b>   |
| Alanine aminotransferase increased                               | 8 (29%)          | 4 (14%)           |
| Lipase increased                                                 | 6 (21%)          | 4 (14%)           |
| Aspartate aminotransferase increased                             | 7 (25%)          | 3 (11%)           |
| Anemia                                                           | 15 (54%)         | 2 (7%)            |
| Hyponatremia                                                     | 12 (43%)         | 2 (7%)            |
| Diarrhea                                                         | 8 (29%)          | 2 (7%)            |
| Lymphocyte count decreased                                       | 6 (21%)          | 2 (7%)            |
| Hematuria                                                        | 5 (18%)          | 2 (7%)            |
| Urinary tract infection                                          | 4 (14%)          | 2 (7%)            |
| Blood bilirubin increased                                        | 3 (11%)          | 2 (7%)            |
| Serum amylase increased                                          | 9 (32%)          | 1 (4%)            |
| Alkaline phosphatase increased                                   | 6 (21%)          | 1 (4%)            |
| Proteinuria                                                      | 6 (21%)          | 1 (4%)            |
| Hypokalemia                                                      | 2 (7%)           | 1 (4%)            |
| Arthritis                                                        | 1 (4%)           | 1 (4%)            |
| Autoimmune disorder                                              | 1 (4%)           | 1 (4%)            |
| Colitis                                                          | 1 (4%)           | 1 (4%)            |
| GGT increased                                                    | 1 (4%)           | 1 (4%)            |
| Hepatic failure                                                  | 1 (4%)           | 1 (4%)            |
| Hepatobiliary disorders - Other, specify-Hepatitis               | 1 (4%)           | 1 (4%)            |
| Infections and infestations - Other, specify-C Diff              | 1 (4%)           | 1 (4%)            |
| Metabolism and nutrition disorders - Other, specify-failure to t | 1 (4%)           | 1 (4%)            |
| Surgical and medical procedures - Other, specify-Nephrostomy tub | 1 (4%)           | 1 (4%)            |
| Hypoalbuminemia                                                  | 9 (32%)          | 0 (0%)            |
| Rash maculo-papular                                              | 9 (32%)          | 0 (0%)            |
| Fatigue                                                          | 8 (29%)          | 0 (0%)            |
| Hyperglycemia                                                    | 8 (29%)          | 0 (0%)            |
| Hyperkalemia                                                     | 8 (29%)          | 0 (0%)            |
| Hypomagnesemia                                                   | 8 (29%)          | 0 (0%)            |
| INR increased                                                    | 8 (29%)          | 0 (0%)            |
| Creatinine increased                                             | 7 (25%)          | 0 (0%)            |
| Hypocalcemia                                                     | 7 (25%)          | 0 (0%)            |
| Pruritus                                                         | 7 (25%)          | 0 (0%)            |
| Constipation                                                     | 6 (21%)          | 0 (0%)            |
| Edema limbs                                                      | 5 (18%)          | 0 (0%)            |
| Hyperthyroidism                                                  | 5 (18%)          | 0 (0%)            |
| Nausea                                                           | 5 (18%)          | 0 (0%)            |
| Abdominal pain                                                   | 4 (14%)          | 0 (0%)            |
| Activated partial thromboplastin time prolonged                  | 4 (14%)          | 0 (0%)            |
| Arthralgia                                                       | 4 (14%)          | 0 (0%)            |
| Fever                                                            | 4 (14%)          | 0 (0%)            |
| Hypertriglyceridemia                                             | 4 (14%)          | 0 (0%)            |
| Cholesterol high                                                 | 3 (11%)          | 0 (0%)            |
| Hypernatremia                                                    | 3 (11%)          | 0 (0%)            |
| Insomnia                                                         | 3 (11%)          | 0 (0%)            |
| Pain                                                             | 3 (11%)          | 0 (0%)            |
| Platelet count decreased                                         | 3 (11%)          | 0 (0%)            |
| Vomiting                                                         | 3 (11%)          | 0 (0%)            |
| Anorexia                                                         | 2 (7%)           | 0 (0%)            |
| Anxiety                                                          | 2 (7%)           | 0 (0%)            |
| Back pain                                                        | 2 (7%)           | 0 (0%)            |
| Cough                                                            | 2 (7%)           | 0 (0%)            |
| Dizziness                                                        | 2 (7%)           | 0 (0%)            |
| Dry mouth                                                        | 2 (7%)           | 0 (0%)            |
| Dry skin                                                         | 2 (7%)           | 0 (0%)            |
| Dyspnea                                                          | 2 (7%)           | 0 (0%)            |

**Supplemental Table S3: All Adverse Events Regardless of Relation**

| <b>All Adverse Event</b>                                         | Total (N=28) |                   |
|------------------------------------------------------------------|--------------|-------------------|
|                                                                  | All<br>N (%) | Grade 3+<br>N (%) |
| Flatulence                                                       | 2 (7%)       | 0 (0%)            |
| Headache                                                         | 2 (7%)       | 0 (0%)            |
| Hemorrhoidal hemorrhage                                          | 2 (7%)       | 0 (0%)            |
| Hyperuricemia                                                    | 2 (7%)       | 0 (0%)            |
| Investigations - Other, specify-fibrinogen increase              | 2 (7%)       | 0 (0%)            |
| Lymphocyte count increased                                       | 2 (7%)       | 0 (0%)            |
| Tinnitus                                                         | 2 (7%)       | 0 (0%)            |
| Urinary retention                                                | 2 (7%)       | 0 (0%)            |
| Bladder spasm                                                    | 1 (4%)       | 0 (0%)            |
| Bloating                                                         | 1 (4%)       | 0 (0%)            |
| Blood and lymphatic system disorders - Other, specify-fibrinogen | 1 (4%)       | 0 (0%)            |
| Concentration impairment                                         | 1 (4%)       | 0 (0%)            |
| Dehydration                                                      | 1 (4%)       | 0 (0%)            |
| Ear and labyrinth disorders - Other, specify-Right External Ear  | 1 (4%)       | 0 (0%)            |
| Endocrine disorders - Other, specify-Increased TSH               | 1 (4%)       | 0 (0%)            |
| Endocrine disorders - Other, specify-TSH Decrease                | 1 (4%)       | 0 (0%)            |
| Endocrine disorders - Other, specify-TSH Elevated decreased      | 1 (4%)       | 0 (0%)            |
| Enterocolitis                                                    | 1 (4%)       | 0 (0%)            |
| Flu like symptoms                                                | 1 (4%)       | 0 (0%)            |
| Gastroesophageal reflux disease                                  | 1 (4%)       | 0 (0%)            |
| Gastrointestinal disorders - Other, specify-Belching/ Indigestio | 1 (4%)       | 0 (0%)            |
| Gastrointestinal disorders - Other, specify-tooth sensitivity    | 1 (4%)       | 0 (0%)            |
| Generalized muscle weakness                                      | 1 (4%)       | 0 (0%)            |
| Hiccups                                                          | 1 (4%)       | 0 (0%)            |
| Hypercalcemia                                                    | 1 (4%)       | 0 (0%)            |
| Hypermagnesemia                                                  | 1 (4%)       | 0 (0%)            |
| Hypertension                                                     | 1 (4%)       | 0 (0%)            |
| Hypotension                                                      | 1 (4%)       | 0 (0%)            |
| Hypothyroidism                                                   | 1 (4%)       | 0 (0%)            |
| Ileus                                                            | 1 (4%)       | 0 (0%)            |
| Infusion related reaction                                        | 1 (4%)       | 0 (0%)            |
| Investigations - Other, specify-AST increase                     | 1 (4%)       | 0 (0%)            |
| Investigations - Other, specify-BUN Increase                     | 1 (4%)       | 0 (0%)            |
| Investigations - Other, specify-Beta 2 Micro                     | 1 (4%)       | 0 (0%)            |
| Investigations - Other, specify-Beta 2 Microglobulin             | 1 (4%)       | 0 (0%)            |
| Investigations - Other, specify-CO2 Decrease                     | 1 (4%)       | 0 (0%)            |
| Investigations - Other, specify-Decreased CO2                    | 1 (4%)       | 0 (0%)            |
| Investigations - Other, specify-Elevated Chloride                | 1 (4%)       | 0 (0%)            |
| Investigations - Other, specify-Elevated WBC                     | 1 (4%)       | 0 (0%)            |
| Investigations - Other, specify-Fibrinogen Increase              | 1 (4%)       | 0 (0%)            |
| Investigations - Other, specify-Gamma Glutamyl Transferase GGT i | 1 (4%)       | 0 (0%)            |
| Investigations - Other, specify-Increased Fibrinogen             | 1 (4%)       | 0 (0%)            |
| Investigations - Other, specify-PT Decreased                     | 1 (4%)       | 0 (0%)            |
| Investigations - Other, specify-PTT Increase                     | 1 (4%)       | 0 (0%)            |
| Investigations - Other, specify-PTT increased                    | 1 (4%)       | 0 (0%)            |
| Investigations - Other, specify-Platelet Count Increased         | 1 (4%)       | 0 (0%)            |
| Investigations - Other, specify-Prothrombin Time Increased       | 1 (4%)       | 0 (0%)            |
| Investigations - Other, specify-Red Blood Cell Decreased         | 1 (4%)       | 0 (0%)            |
| Investigations - Other, specify-Total Protein Increase           | 1 (4%)       | 0 (0%)            |
| Investigations - Other, specify-WBC elevated                     | 1 (4%)       | 0 (0%)            |
| Investigations - Other, specify-White Blood Cell Increase        | 1 (4%)       | 0 (0%)            |
| Investigations - Other, specify-transferrin decrease             | 1 (4%)       | 0 (0%)            |
| Metabolism and nutrition disorders - Other, specify-CO2 Decrease | 1 (4%)       | 0 (0%)            |
| Metabolism and nutrition disorders - Other, specify-Decreased WB | 1 (4%)       | 0 (0%)            |
| Mucosal infection                                                | 1 (4%)       | 0 (0%)            |
| Musculoskeletal and connective tissue disorder - Other, specify  | 1 (4%)       | 0 (0%)            |
| Myalgia                                                          | 1 (4%)       | 0 (0%)            |

**Supplemental Table S3: All Adverse Events Regardless of Relation**

| <b>All Adverse Event</b>                                         | Total (N=28) |                   |
|------------------------------------------------------------------|--------------|-------------------|
|                                                                  | All<br>N (%) | Grade 3+<br>N (%) |
| Nasal congestion                                                 | 1 (4%)       | 0 (0%)            |
| Nervous system disorders - Other, specify-Left foot pronation    | 1 (4%)       | 0 (0%)            |
| Neutrophil count decreased                                       | 1 (4%)       | 0 (0%)            |
| Pain in extremity                                                | 1 (4%)       | 0 (0%)            |
| Rash acneiform                                                   | 1 (4%)       | 0 (0%)            |
| Renal and urinary disorders - Other, specify-Difficulty urinatio | 1 (4%)       | 0 (0%)            |
| Renal and urinary disorders - Other, specify-Dysuria             | 1 (4%)       | 0 (0%)            |
| Renal and urinary disorders - Other, specify-dysuria             | 1 (4%)       | 0 (0%)            |
| Sinus tachycardia                                                | 1 (4%)       | 0 (0%)            |
| Surgical and medical procedures - Other, specify-Ureteroileal Co | 1 (4%)       | 0 (0%)            |
| Thromboembolic event                                             | 1 (4%)       | 0 (0%)            |
| Tremor                                                           | 1 (4%)       | 0 (0%)            |
| Urinary frequency                                                | 1 (4%)       | 0 (0%)            |
| Urinary tract pain                                               | 1 (4%)       | 0 (0%)            |
| Urine discoloration                                              | 1 (4%)       | 0 (0%)            |
| White blood cell decreased                                       | 1 (4%)       | 0 (0%)            |

**Supplementary Table S4: Outcomes of patients who did not complete cystectomy as per clinical trial protocol**

| <b>Patient #</b> | <b>Age and gender</b> | <b>Clinical Stage at Baseline</b> | <b>Reason for no cystectomy</b>                                                                      | <b>Subsequent treatment</b>                                                                                                 | <b>Underwent definitive management</b> | <b>Alive or deceased since Cycle 1, day 1</b>    |
|------------------|-----------------------|-----------------------------------|------------------------------------------------------------------------------------------------------|-----------------------------------------------------------------------------------------------------------------------------|----------------------------------------|--------------------------------------------------|
| <b>1</b>         | 78 F                  | cT3bN0                            | Progression in lymph nodes                                                                           | Chemotherapy (gemcitabine, paclitaxel, adriamycin)                                                                          | Cystectomy (pCR)                       | Alive with no evidence of disease at 29.6 months |
| <b>19</b>        | 83 F                  | cT4aN0                            | Progression with new hydronephrosis                                                                  | Chemotherapy (gemcitabine, paclitaxel, adriamycin)                                                                          | Chemoradiation                         | Alive with no evidence of disease at 19.5 months |
| <b>28</b>        | 69 M                  | cT3bN0                            | Cystectomy aborted due to gross extravesical disease growing into the pubic rami and pelvic fixation | Chemotherapy (gemcitabine and carboplatin)                                                                                  | Chemoradiation                         | Alive with no evidence of disease at 14.9 months |
| <b>33</b>        | 78 M                  | cT2N0                             | Declined by patient; dropped out of study.                                                           | Has negative cystoscopy, negative urine cytology and negative CT scan. Patient declined cystectomy and dropped out of study | Declined by patient                    | Alive with no evidence of disease at 11.8 months |

pCR: pathologic complete response

**Supplementary Table S5: post-cystectomy complications**

| <b>Post-surgery, N=24</b>                    | <b>No. (%)</b> |
|----------------------------------------------|----------------|
| Median hospital stay, D (range)              | 6 (3-19)       |
| Median PRBC units, n (range)                 | 0 (0-4)        |
| Median intraoperative blood loss, mL (range) | 300 (50-1500)  |
| <b>Diversion type</b>                        |                |
| Ileal conduit                                | 19 (79)        |
| Orthotopic neobladder                        | 3 (12.5)       |
| Nephroureterectomy                           | 2 (8.5)        |
| Perioperative mortality                      | 0 (0)          |
| <b>Postoperative complications</b>           |                |
| Arrhythmia                                   | 1 (4)          |
| Ileus                                        | 3 (12.5)       |
| Urinary tract infection                      | 1 (4)          |
| Infection with no obvious source             | 1 (4)          |
| <b>Surgical complications</b>                |                |
| Obturator nerve damage                       | 1 (4)          |

D: day, mL: millilitre



**Supplementary Table 6: Key Resource Table**

| Reagent or Resource                                                         | Source                                                        | Identifier           | Dilution           |
|-----------------------------------------------------------------------------|---------------------------------------------------------------|----------------------|--------------------|
| <b>Antibodies for immunohistochemistry and multiplex immunofluorescence</b> |                                                               |                      |                    |
| Anti-CD20 (L26)                                                             | Dako                                                          | M075529-2            | IHC 1:500 IF 1:250 |
| Anti-CD3 (F7.2.38)                                                          | Dako                                                          | A0452                | IHC 1:100          |
| Anti-CD4 (4B12)                                                             | Leica                                                         | NCL-L-CD4-368        | IHC 1:100          |
| Anti-CD8 (C8/144B)                                                          | Thermo Scientific                                             | MS-457-S             | IHC 1:100 IF 1:100 |
| Anti-PD-L1 (E1L3N)                                                          | Cell Signaling                                                | 13684S               | IHC 1:100          |
| Anti-ICOS (SP98)                                                            | Spring Bioscience                                             | M3980                | IF 1:50            |
| Anti-CD4 (EPR6855)                                                          | Abcam                                                         | AB133616             | IHC 1:100 IF 1:50  |
| Anti-FOXP3 (D6O8R)                                                          | Cell Signaling                                                | 12653                | IHC 1:200 IF 1:50  |
| Anti-CD21 (2G9)                                                             | Leica                                                         | NCL L-CD21-2G9       | IHC 1:20 IF 1:10   |
| <b>Chemicals</b>                                                            |                                                               |                      |                    |
| Antibody Stabilizer                                                         | Candor Biosciences                                            | Cat# 131 050         |                    |
| Cisplatin                                                                   | Fluidigm                                                      | Cat# 201064          |                    |
| Cy3                                                                         | Akoya                                                         | Cat# NEL744B001KT    |                    |
| Cy5                                                                         | Akoya                                                         | Cat# NEL745B001KT    |                    |
| Cy5.5                                                                       | Akoya                                                         | Cat# NEL766B001KT    |                    |
| DAPI                                                                        | Akoya                                                         | Cat# FP1490          |                    |
| EQ 4-element beads                                                          | Fluidigm                                                      | Cat# 201078          |                    |
| Opal 480                                                                    | Akoya                                                         | NEL871001KT          |                    |
| Opal 520                                                                    | Akoya                                                         | NEL871001KT          |                    |
| Opal 570                                                                    | Akoya                                                         | NEL871001KT          |                    |
| Opal 620                                                                    | Akoya                                                         | NEL871001KT          |                    |
| Opal 690                                                                    | Akoya                                                         | NEL871001KT          |                    |
| Ab Blocking buffer                                                          | Akoya                                                         | NEL871001KT          |                    |
| Opal Polymer HRP Ms+Rb 2' Ab                                                | Akoya                                                         | NEL871001KT          |                    |
| BOND Polymer Refine IHC Detection Kit                                       | Leica Biosystems                                              | DS9800               |                    |
| Ir DNA-Intercalator                                                         | Fluidigm                                                      | Cat# 201192A         |                    |
| VECTASHIELD HardSet Antifade Mounting Medium                                | Vector Laboratories                                           | Cat# H-1400          |                    |
| <b>Commercial Assays</b>                                                    |                                                               |                      |                    |
| X8 Antibody Labeling Kit                                                    | Fluidigm                                                      | N/A (metal specific) |                    |
| <b>Deposited Data</b>                                                       |                                                               |                      |                    |
| NanoString data                                                             | <a href="https://ega-archive.org">https://ega-archive.org</a> | EGAS00001004074      |                    |
| Whole exome sequencing data                                                 | <a href="https://ega-archive.org">https://ega-archive.org</a> | EGAS00001004074      |                    |

| <b>Software and Databases</b> |                                              |                                                                                                                                                           |
|-------------------------------|----------------------------------------------|-----------------------------------------------------------------------------------------------------------------------------------------------------------|
| HALO 2.3.2089.70              | Indica Labs                                  | Indicalab.com                                                                                                                                             |
| inForm 2.4.2                  | Akoya                                        | Akoyabio.com                                                                                                                                              |
| Vectra Polaris 1.0.11         | Akoya                                        | Akoyabio.com                                                                                                                                              |
| Vectra 3.0.7                  | Akoya                                        | Akoyabio.com                                                                                                                                              |
| Bead Normalization            | (Finck et al., 2013)                         | R package premissa                                                                                                                                        |
| Cytof Workflow                | (Nowicka, et al. 2017)                       | R package cytofworkflow                                                                                                                                   |
| FlowJo                        | Tree Star, Inc.                              | <a href="https://www.flowjo.com/">https://www.flowjo.com/</a>                                                                                             |
| Helios software 6.5.358       | Fluidigm                                     | <a href="https://www.fluidigm.com/software">https://www.fluidigm.com/software</a>                                                                         |
| Prism 8.0                     | GraphPad                                     | Graphpad.com                                                                                                                                              |
| Adobe Illustrator             | Adobe                                        | Adobe.com                                                                                                                                                 |
| R 3.6.1                       | R Core Team (2019)                           | <a href="https://www.r-project.org/">https://www.r-project.org/</a>                                                                                       |
| R package: maftools 2.0.16    | (Mayakonda et al., 2018)                     | <a href="https://www.r-project.org/">https://www.r-project.org/</a>                                                                                       |
| R package: survival 3.2-3     | R Core Team (2019)                           | <a href="https://www.r-project.org/">https://www.r-project.org/</a>                                                                                       |
| BWA 0.7.5a                    | (Li & Durbin, 2009)                          | <a href="http://bio-bwa.sourceforge.net/">http://bio-bwa.sourceforge.net/</a>                                                                             |
| GATK 3.1-1                    | (McKenna et al., 2010)                       | <a href="https://gatk.broadinstitute.org/hc/en-us">https://gatk.broadinstitute.org/hc/en-us</a>                                                           |
| Picard 1.112                  | Broad Institute (2018)                       | <a href="https://sourceforge.net">https://sourceforge.net</a>                                                                                             |
| Mutect 1.1.4                  | (Cibulskis et al., 2013)                     | <a href="http://www.broadinstitute.org/cancer/cga/mutect">http://www.broadinstitute.org/cancer/cga/mutect</a>                                             |
| Pindel 024t                   | (Ye et al., 2009)                            | <a href="http://gmt.genome.wustl.edu/packages/pindel/">http://gmt.genome.wustl.edu/packages/pindel/</a>                                                   |
| ANNOVAR 2018-04-16            | (Wang et al., 2010)                          | <a href="https://annovar.openbioinformatics.org/en/latest/user-guide/download/">https://annovar.openbioinformatics.org/en/latest/user-guide/download/</a> |
| HLA-VBSeq v2                  | (Wang et al., 2019)                          | <a href="http://nagasakilab.csml.org/hla/">http://nagasakilab.csml.org/hla/</a>                                                                           |
| SIFT 6.2.1                    | (Sim et al., 2012)                           | <a href="https://sift.bii.a-star.edu.sg/">https://sift.bii.a-star.edu.sg/</a>                                                                             |
| pVAC-Seq 4.0.10               | (Hundal et al., 2016); (Hundal et al., 2019) | <a href="https://pvac-seq.readthedocs.io/en/latest/">https://pvac-seq.readthedocs.io/en/latest/</a>                                                       |
| nSolver 4.0                   | NanoString, Inc.                             | <a href="http://www.nanostring.com/products/nSolver">http://www.nanostring.com/products/nSolver</a>                                                       |
| COSMIC                        | (Tate et al., 2019)                          | <a href="https://cancer.sanger.ac.uk/cosmic">https://cancer.sanger.ac.uk/cosmic</a>                                                                       |
| EXAC                          | (Lek et al., 2016)                           | <a href="http://biorxiv.org/lookup/doi/10.1101/030338">http://biorxiv.org/lookup/doi/10.1101/030338</a>                                                   |
| ESP600                        | Exome Sequencing Project (ESP), Seattle, WA  | <a href="https://esp.gs.washington.edu">https://esp.gs.washington.edu</a>                                                                                 |
| 1000 Genome                   | The 1000 Genomes Project Consortium, 2015    | <a href="https://www.internationalgenome.org/">https://www.internationalgenome.org/</a>                                                                   |
| UCSC genome browser           | (Kent et al., 2002)                          | <a href="http://genome.ucsc.edu/">http://genome.ucsc.edu/</a>                                                                                             |

| <b>Antibodies for CYTOF</b> |               |                   |                 |
|-----------------------------|---------------|-------------------|-----------------|
| <b>Reagent or Resource</b>  | <b>Source</b> | <b>Identifier</b> | <b>Dilution</b> |
| Anti-CD45 (clone HI30)      | Fluidigm      | 3089003B          | 1:400           |
| Anti-CD8a (clone RPA-T8)    | Biolegend     | 301053            | 1:100           |
| Anti-CCR7 (clone G043H7)    | Biolegend     | 353237            | 1:125           |
| Anti-PD1 (clone EH12.2H7)   | Biolegend     | 329941            | 1:100           |
| Anti-Eomes (clone WD1928)   | eBioscience   | 14-4877-82        | 1:167           |
| Anti-CD163 (clone DHI/61)   | Fluidigm      | 3145010B          | 1:100           |
| Anti-CD11c (clone 3.9)      | Fluidigm      | 3146014B          | 1:400           |
| Anti-Tbet (clone 4B10)      | Biolegend     | 644825            | 1:200           |
| Anti-CD16 (clone 3G8)       | Fluidigm      | 3148004B          | 1:100           |

|                             |             |            |       |
|-----------------------------|-------------|------------|-------|
| Anti-CD66b (clone G10F5)    | Biolegend   | 305102     | 1:100 |
| Anti-PD-L1 (clone MIH1)     | eBioscience | 14-5983-82 | 1:100 |
| Anti-CD123 (clone 6H6)      | Fluidigm    | 3151001B   | 1:200 |
| Anti-TCRgd (clone 11F2)     | Fluidigm    | 3152008B   | 1:100 |
| Anti-ICOS (clone ISA-3)     | eBioscience | 14-9948-82 | 1:167 |
| Anti-RORgT (clone 600214)   | R&D         | MAB6109    | 1:100 |
| Anti-CD45RA (clone H100)    | Fluidigm    | 3155011B   | 1:200 |
| Anti-CD86 (clone IT2.2)     | Fluidigm    | 3156008B   | 1:100 |
| Anti-LAG3 (clone 11C3C65)   | Biolegend   | 369302     | 1:100 |
| Anti-VISTA (clone 730804)   | R&D         | MAB71261   | 1:100 |
| Anti-CD14 (clone M5E2)      | Fluidigm    | 3160001B   | 1:100 |
| Anti-CTLA-4 (clone 14D3)    | Fluidigm    | 3161004B   | 1:200 |
| Anti-FoxP3 (clone PCH101)   | Fluidigm    | 3162011A   | 1:200 |
| Anti-BTLA (clone J168-540)  | BD          | 624084     | 1:100 |
| Anti-CD19 (clone HIB19)     | Biolegend   | 302202     | 1:167 |
| Anti-TCF7 (clone 7F11A10)   | Biolegend   | 655202     | 1:125 |
| Anti-TIM3 (clone F38-2E2)   | Biolegend   | 345019     | 1:200 |
| Anti-GATA3 (clone L50-823)  | BD          | 558686     | 1:125 |
| Anti-CD73 (clone AD2)       | Fluidigm    | 3168015B   | 1:500 |
| Anti-CD4 (clone RPA-T4)     | Biolegend   | 300502     | 1:167 |
| Anti-CD3 (clone UCHT1)      | Biolegend   | 300437     | 1:100 |
| Anti-CD68 (clone Y1/82A)    | Fluidigm    | 3171011B   | 1:200 |
| Anti-CD28 (clone CD28.2)    | BioLegend   | 302937     | 1:125 |
| Anti-GranzymeB (clone GB11) | Fluidigm    | 3173006B   | 1:100 |
| Anti-Ki67 (clone Ki67)      | Biolegend   | 350523     | 1:200 |
| Anti-CD45RO (clone UCHL1)   | Biolegend   | 304239     | 1:200 |
| Anti-CD56 (clone NCAM16.2)  | Fluidigm    | 3176008B   | 1:100 |
| Anti-HLADR (clone L243)     | Fluidigm    | Custom     | 1:400 |
